# Supplementary material for: Differential Control of Notch1 Gene Transcription by Klf4 and Sp3 Transcription Factors in Normal versus Cancer-Derived Keratinocytes
Source: PubMed Central journal article supplement (PMC2860992; doi:10.1371/journal.pone.0010369), 2010-04-28
Supplement: pone.0010369.s001.pdf [file pone.0010369.s001.pdf]

Notch1 promoter RT-PCR primers:

| Name        | Primers sequence (5'-3')                                           |
|-------------|--------------------------------------------------------------------|
| -740/-262   | Frontal: CACACACGGCTAGGCCAC<br>Reverse: GTGAGGCTCAGAGTCGAGGT       |
| -262/-174   | Frontal: ACTAGTGCCTCGGCCGCG<br>Reverse: CCCGGCTCGTTCCTTCGC         |
| -262/-68    | Frontal: ACTAGTGCCTCGGCCGCG<br>Reverse: ACACGCGCGGCGTACGGT         |
| +114/+1127  | Frontal: TCCGCGCCCTTTGGAACTTT<br>Reverse: AGAATCAGAGCGGCCCATTTGTG  |
| +1128/+1737 | Frontal: ACAATGGGCCGCTCTGATTCTG<br>Reverse: TTCACACTTCCCGCCATTCAGG |

Real-time RT-PCR primers:

| Name                     | Primers sequence (5'-3')                                        |
|--------------------------|-----------------------------------------------------------------|
| <b>Notch1 5'UTR/Ex3</b>  | Frontal: AGAGGGCAGCCGGTGGGGAG<br>Reverse: TGCCTGACCACAGTGGC     |
| <b>Notch1 Ex33/3'UTR</b> | Frontal: CTGAAGAACGGGGCTAACAA<br>Reverse: CAGGTTGTAAGTCCAGCA    |
| <b>Notch1 Ex34</b>       | Frontal: GAACCAATACAACCTCTGC<br>Reverse: AGCTCATCATCTGGGACAGG   |
| <b>Notch1 intron1</b>    | Frontal: TTCTGTTGCTTCTCCGGG<br>Reverse: AACCCCTCCCCAACTGA       |
| <b>18S</b>               | Frontal: GCAATTATTCCCATGAACG<br>Reverse: GGCCTCACTAAACCATCCAA   |
| <b>36b4</b>              | Frontal: GCAATGTTGCCAGTGTCTGT<br>Reverse: GCCTTGACCTTTTCAGCAAG  |
| <b>Sp1</b>               | Frontal: GCTGGAGAGTCAAAGGCAT<br>Reverse: TAGTGAAAGCCCCCTACC     |
| <b>Sp3</b>               | Frontal: GTTGAGGCATTTGGGTGGTA<br>Reverse: GGGAGACATGGTTTTTGGAA  |
| <b>KLF4</b>              | Frontal: CCAATTACCCATCCTTCTCTG<br>Reverse: CGATCGTCTTCCCCTCTTTG |
| <b>KLF5</b>              | Frontal: CCCTTGCACATACACAATGC<br>Reverse: AGTAACTGGCAGGGTGGTG   |
| <b>KLF10a</b>            | Frontal: CAACTTCGGTGCCTCTCT<br>Reverse: GCTCATTGACATAAGTGCTTCT  |

ChIP primers:

| Name                         | Primers sequence (5'-3')                                       |
|------------------------------|----------------------------------------------------------------|
| <b>Site '1'(-6669/-6113)</b> | Frontal: GGGAAGAGAGAGTGCAGCTGC<br>Reverse: TGCCTGGTGCCCCAAGTGG |
| <b>Site '2' (-740/-262)</b>  | Frontal: CACACACGGCTAGGCCAC<br>Reverse: GTGAGGCTCAGAGTCGAGGT   |
| <b>Site '3'(Ex34)</b>        | Frontal: GAACCAATACAACCTCTGC<br>Reverse: AGCTCATCATCTGGGACAGG  |
| <b>ChIP p21</b>              | Frontal: CCGGCTCCACAAGGAACT<br>Reverse: ACCAACGCAGGCGAGGGACT   |

siRNAs:

| Name   | Oligo ID  | Provider   |
|--------|-----------|------------|
| Sp1i   | HSS110104 | Invitrogen |
| Sp3i   | HSS110111 | Invitrogen |
| KLF4i  | HSS113794 | Invitrogen |
| UBE3Ai | HSS111136 | Invitrogen |

**Table S1.** List of primers for RT-PCR and real-time RT-PCR, and siRNAs (Stealth RNAi)
